# Supplementary material for: Environmentally benign magnetic chitosan/Fe3O4 composites as reductant and stabilizer for anchoring Au NPs and their catalytic reduction of 4-nitrophenol
Source: Royal Society of Chemistry journal article supplement (doi:10.1039/c4ta02268h), 2014-01-01
Supplement: c4ta02268h1.pdf [file c4ta02268h1.pdf]

## Environmentally Benign Magnetic Chitosan/ $\text{Fe}_3\text{O}_4$ Composites as Reductant and Stabilizer for Anchoring Au NPs and Their Catalytic Reduction of 4-nitrophenol

Yunfeng Qiu,<sup>a</sup> Zhuo Ma<sup>b</sup> and PingAn Hu<sup>\*a</sup>,

<sup>a</sup> State Key Lab of Urban Water Resource and Environment & Key Lab of Microsystem and Microstructure of the Ministry of Education, Harbin Institute of Technology, Harbin, Heilongjiang 150080, China. E-mail: [hupa@hit.edu.cn](mailto:hupa@hit.edu.cn)

<sup>b</sup> School of Life Science and Technology, Harbin Institute of Technology, 92 West Dazhi Street, Harbin, Heilongjiang, 150001, P.R. China.

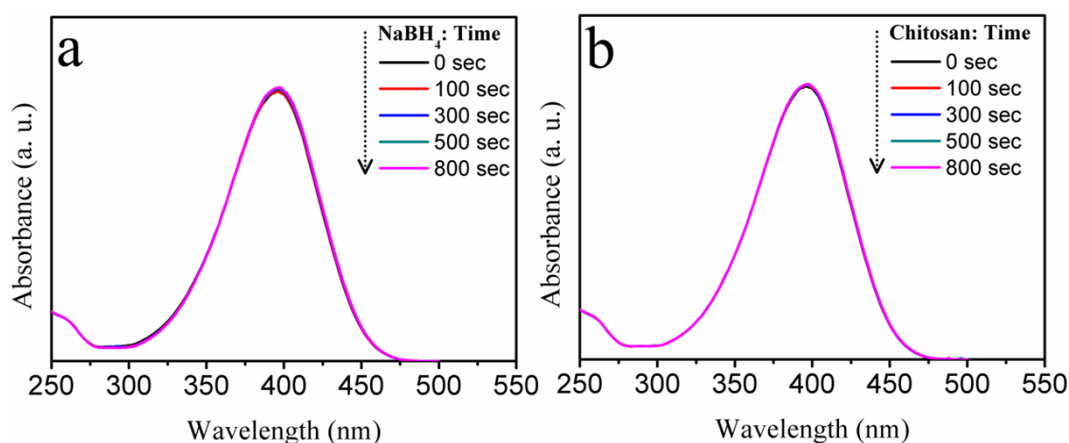

**Fig. S1** (a) and (b) are UV-vis spectra of 4-nitrophenolate ion in distilled water during the reduction reaction in the presence of  $\text{NaBH}_4$  and chitosan/ $\text{NaBH}_4$  without Au NPs, respectively. The characteristic peak intensity of 4-nitrophenolate ion was unchanged. The results illustrated that  $\text{NaBH}_4$  was inert towards the reduction of 4-NP. Additionally, the reduction reaction couldn't proceed efficiently only in the presence of chitosan/ $\text{NaBH}_4$  without any Au NPs.

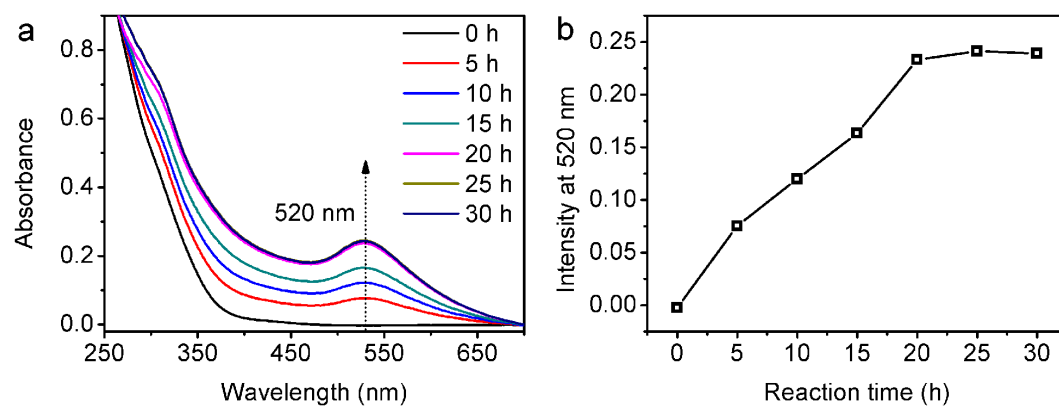

**Fig. S2** (a) UV-vis spectra measurements of 2.5 wt% Au loading amount as a function of aging time; (b) Plot of the intensity at 520 nm against reaction time. It is clear to see that the characteristic peak at 520 nm increased gradually as a function of aging time. And there is a plateau in the plot of intensity at 520 nm against aging time in **Fig. S2b**, viz. the reduction of Au ions to zerovalent Au nanoparticles at 50° ends around 20h.
